# Supplementary material for: N-Acryloylindole-alkyne (NAIA) enables imaging and profiling new ligandable cysteines and oxidized thiols by chemoproteomics
Source: PubMed Central journal article supplement (PMC10272157; doi:10.1038/s41467-023-39268-w), 2023-06-15
Supplement: 41467_2023_39268_MOESM3_ESM.pdf [file 41467_2023_39268_MOESM3_ESM.pdf]

## **Description of Additional Supplementary Files**

File Name: Supplementary Data 1

Description: NAI/NAIA-5 couple to profile oxidized cysteines in HepG2 cells

File Name: Supplementary Data 2

Description: NAIA-5 vs IAA to profile functional cysteines in HepG2 cell lysates

File Name: Supplementary Data 3

Description: NAIA-5 vs DBIA to profile functional cysteines

File Name: Supplementary Data 4

Description: Comparison of functional cysteines profiled by NAIA-5 with those reported in CysDB

File Name: Supplementary Data 5

Description: NAIA-5 vs IAA to profile functional cysteines in live HepG2 cells

File Name: Supplementary Data 6

Description: NAIA-4 vs IAA to profile functional cysteines in 231MFP

File Name: Supplementary Data 7

Description: Competitive ABPP experiment using NAIA-5 and CL-Sc to identify ligandable cysteines

File Name: Supplementary Data 8

Description: Competitive ABPP experiment using NAIA-5 to identify protein targets of CL1 in HepG2
